# Supplementary material
Source: PubMed Central journal article supplement (PMC2774772)
Supplement: NIHMS137913-supplement-1.pdf [file NIHMS137913-supplement-1.pdf]

## Supplementary information

# Mitochondrial Gene Replacement in Primate Offspring and Embryonic Stem Cells

Masahito Tachibana<sup>1</sup>, Michelle Sparman<sup>1</sup>, Hathaitip Sritanandomchai<sup>1</sup>, Hong Ma<sup>1</sup>, Lisa Clepper<sup>1</sup>, Joy Woodward<sup>1</sup>, Ying Li<sup>1</sup>, Cathy Ramsey<sup>1</sup>, Olena Kolotushkina<sup>1</sup> & Shoukhrat Mitalipov<sup>1,2,3</sup>

<sup>1</sup>Oregon National Primate Research Center, <sup>2</sup>Oregon Stem Cell Center and <sup>3</sup>Departments of Obstetrics & Gynecology and Molecular & Medical Genetics, Oregon Health & Science University, 505 N.W. 185<sup>th</sup> Avenue, Beaverton, Oregon 97006, USA.

### Supplementary figures

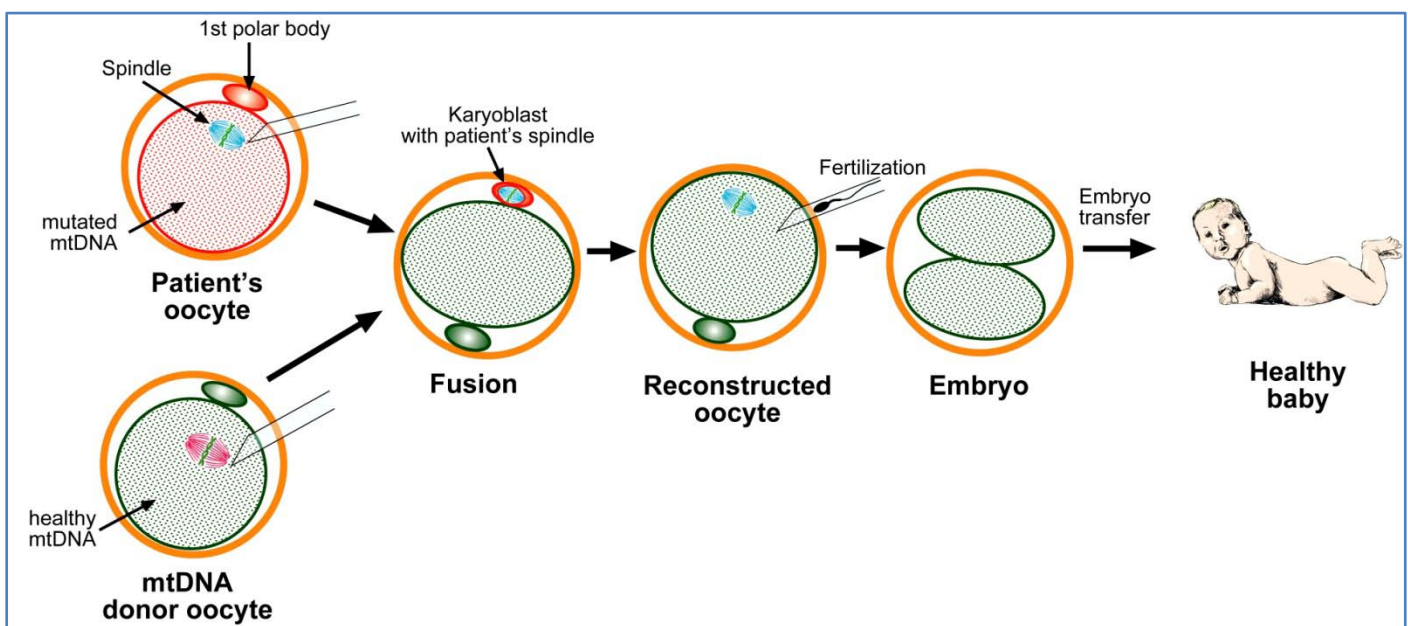

Supplementary Figure 1. Schematic diagram of mitochondrial gene replacement therapy.

The spindle-chromosomal complex (nuclear DNA) from a patient's egg carrying mtDNA mutations is removed and transplanted into an enucleated oocyte donated by a healthy donor. The reconstructed oocyte is then fertilized with the husband's sperm and an embryo is transferred to a patient. The baby will be free of the risk from maternal mtDNA mutations, but yet the biological child of the patients

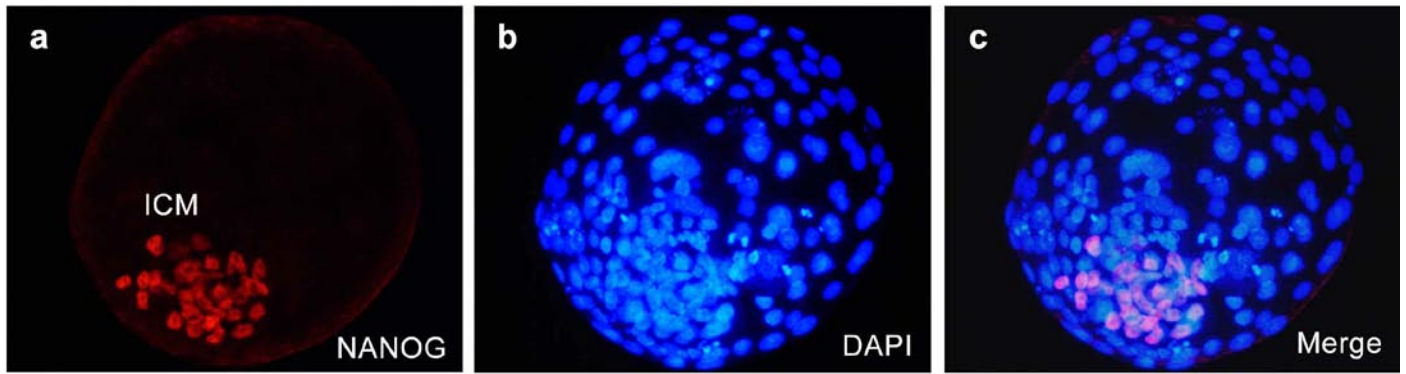

Supplementary Figure 2. Cell counting in ST blastocysts. The inner cell mass (ICM) of blastocyst was labeled with NANOG antibody (red; **a**) and all cell nuclei were stained with DAPI (blue; **b**). **c**, merged image.

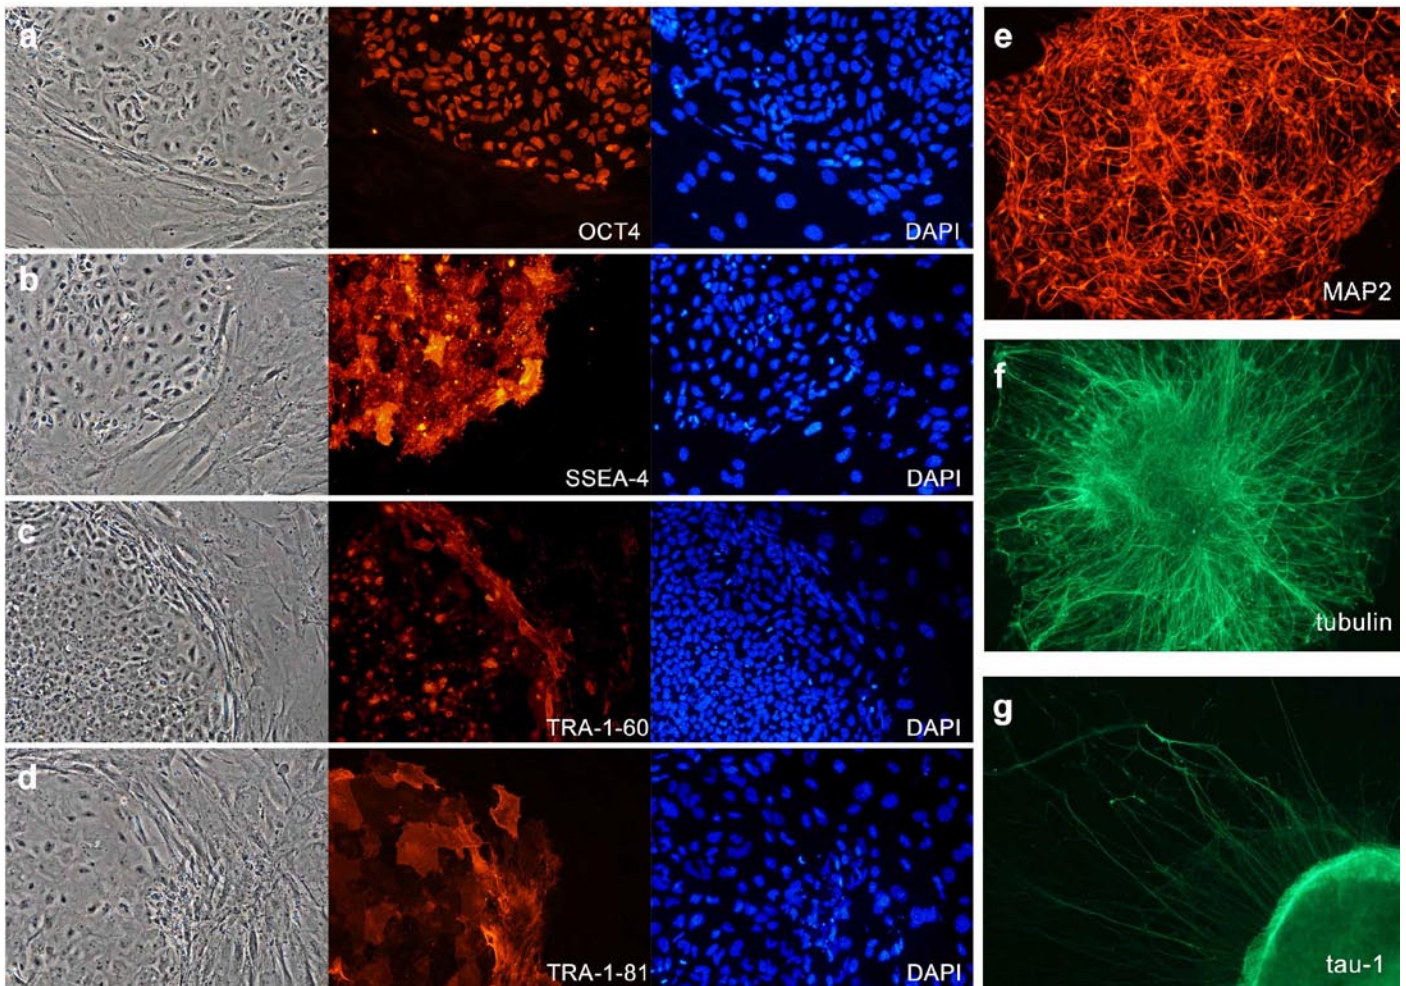

Supplementary Figure 3. Pluripotency analysis of STES cells.

**a-d**, morphology of STES colonies and expression of primate ES cell-specific markers: OCT4, SSEA-4, TRA-1-60 and TRA-1-81. For each stemness marker analyzed, a positive signal was only detected in STES colonies but not in mouse embryonic fibroblast feeder cells. The left hand column of A-D represents phase contrast images, the middle column demonstrates marker expression in the same colonies as detected by immunocytochemistry (red) and the right hand column indicates nuclear DNA in all cells labeled with DAPI (blue). **e-g**, expression of neural markers in differentiated STES cells, including microtubule-associated protein 2 (MAP2),  $\beta$ -III tubulin and tau-1.



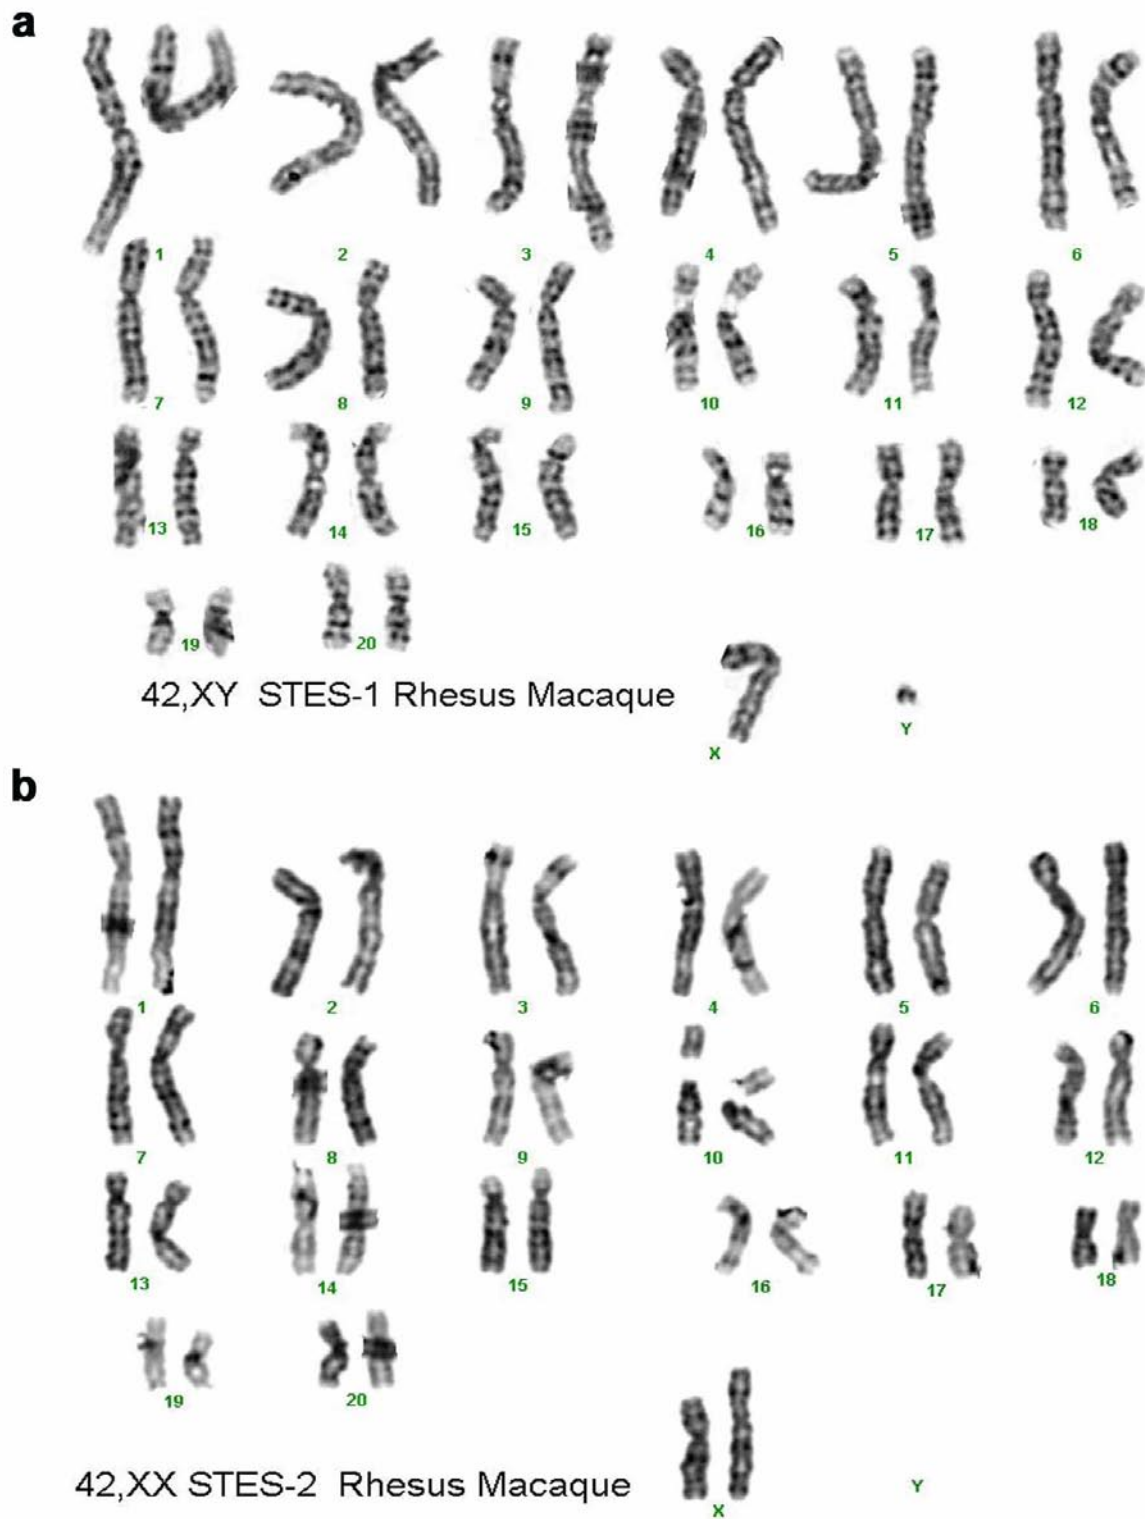

Supplementary Figure 4. Cytogenetic analysis of STES-1 and STES-2 cell lines.

**a-b**, G-banding of STES-1 and STES-2 cell lines demonstrating normal euploid male (42, XY) and female (42, XX) rhesus karyotypes.

**a**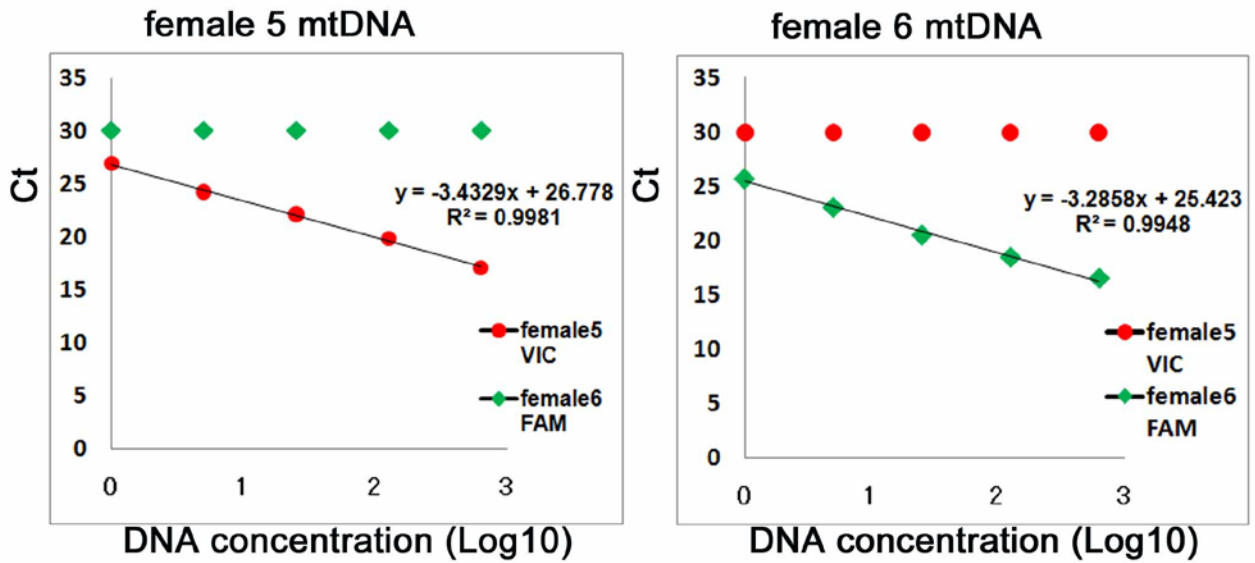**b**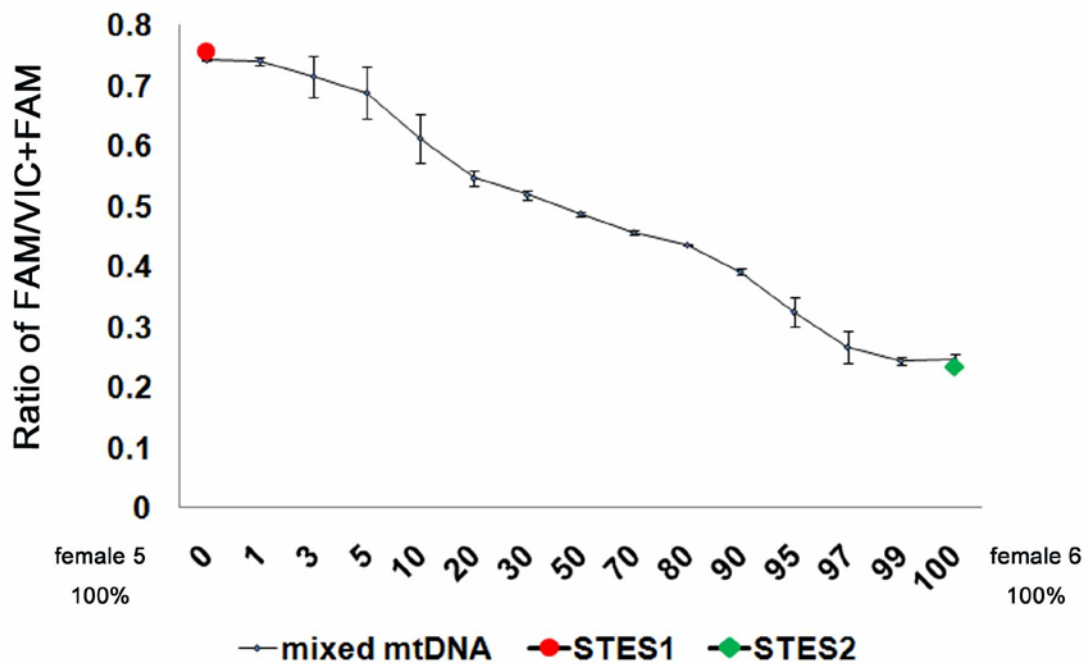

Supplementary Figure 5. MtDNA heteroplasmy analysis by real-time PCR.

**a**, probe specificity testing by serial dilution of mtDNA from females 5 and 6. Both probes hybridized only with associated mtDNA. **b**, the standard curve of serial mtDNA mixtures (0, 1, 3, 5, ..., 95, 97, 99 and 100%) from females 5 and 6. The samples were adjusted to same concentration (30ng/ $\mu$ l) and analyzed 3 times. The value of FAM/VIC+FAM ratio was estimated based on mean Ct value. Detection threshold of both probes was 3%. The values of STES1 and STES2 were  $0.756535 \pm 0.002144$  (s.d) and  $0.234239 \pm 0.001816$  (s.d), respectively.

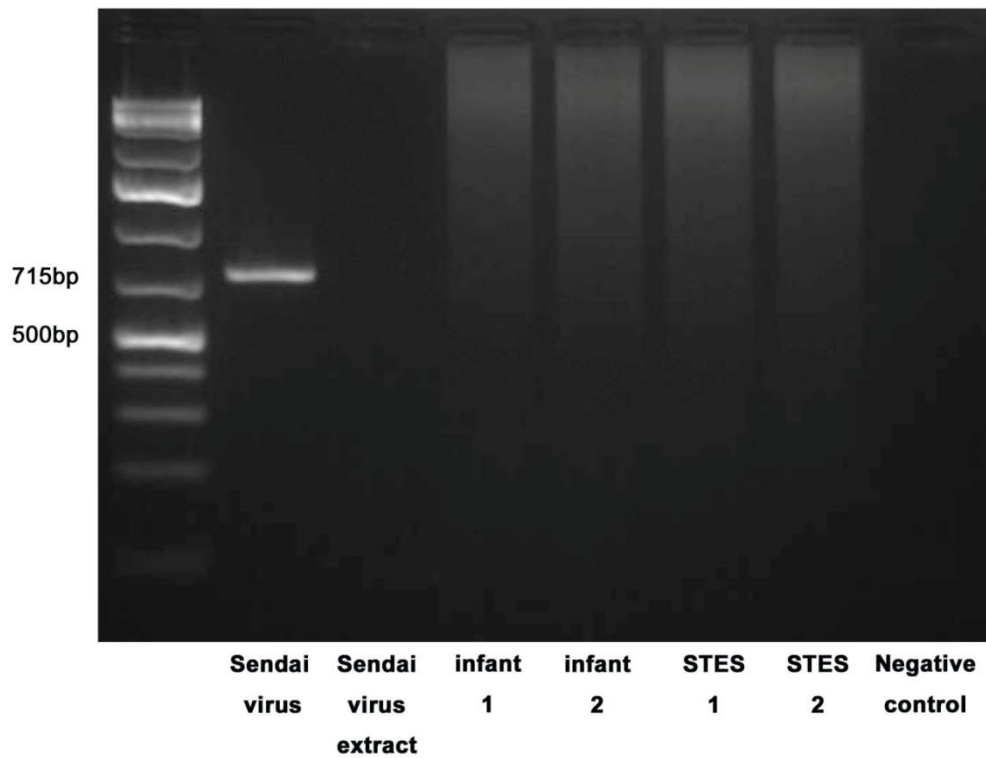

Supplementary Figure 6. Reverse transcription (RT)-PCR analysis demonstrating the absence of SeV genetic material in ST offspring. Sev extract used for karyoplast/cytoplast fusions as well as RNA extracted from placenta of ST infants and two STES cell lines were analyzed using primers specific for F protein-coding sequence as described elsewhere<sup>36</sup>. The expected size of the PCR product is 715bp. Sendai virus was used as a positive control and nuclease free water served as a negative control.

## Supplementary Tables

### Supplementary Table 1. ES cell derivation efficiency from blastocysts generated by spindle-chromosomal complex transfer (ST)

| Treatment | Spindle donor | Cytoplasm donor | N embryos | Embryo stage <sup>a</sup> | Cell line    |
|-----------|---------------|-----------------|-----------|---------------------------|--------------|
| ST        | Female 6      | Female 5        | 1         | ExB (D10)                 | 1 (STES1)    |
| ST        | Female 5      | Female 6        | 3         | HB,ExB (D10)              | 1 (STES2)    |
| ST        | Female 11     | Female 12       | 2         | ExB, B (D8)               | 0            |
| ST        | Female 12     | Female 11       | 2         | B (D8)                    | 0            |
| Control   | Female 6      | Female 6        | 4         | ExB, B (D10)              | 1 (ORMES-26) |

<sup>a</sup> - day of fertilization is considered as day 0 (D0).

B - blastocyst, ExB - expanded blastocyst, HB – hatched blastocyst

### Supplementary Table 2. Pregnancy and implantation rates of ST embryos

| Treatment | Pregnancy rate (%) | Implantation rate(%) |
|-----------|--------------------|----------------------|
| ST        | 3/9 (33)           | 4/15 (27)            |
| ICSI*     | 16/57 (28)*        | 19/131 (17)*         |

\*Data are quoted from our previous study<sup>37</sup>

### Supplementary Table 3. Birth weights and gestation lengths of ST and control non-manipulated infants

| Offspring            | Sex (n)                | Birth weight (kg)      | Gestation period (days) |
|----------------------|------------------------|------------------------|-------------------------|
| ST Infant 1 (Twin)   | male                   | 0.47                   | 155                     |
| ST Infant 2 (Twin)   | male                   | 0.36                   | 155                     |
| ST Infant 3 (Single) | male                   | 0.45                   | 156                     |
| ICSI (Single)*       | males (17)             | 0.51±0.02 <sup>a</sup> | 166 ±1.5 <sup>a</sup>   |
| ICSI (Single)*       | females (18)           | 0.49±0.02 <sup>a</sup> | 161±1.3 <sup>a</sup>    |
| Twins*               | males (2), females (7) | 0.47±0.03 <sup>a</sup> | 164±3.0 <sup>a</sup>    |

\*Data are from our previous study summarizing growth and development of monkey infants produced by various assisted reproductive technologies<sup>37</sup>. ST infants were delivered by C-sections, while most control infants were delivered naturally. This may have contributed to slightly lower birth weights of ST offspring. ICSI; intracytoplasmic sperm injection. Twin; twin pregnancy. Single; singleton pregnancy.

<sup>a</sup>Data are presented as mean value and SEM.

**Supplementary Table 4. Short tandem repeat (STR) analysis of ST infants and cell lines**

| STR loci        | female<br>1 | female<br>2 | male<br>1 | infant<br>1 | infant<br>2 | ST1 <sup>a</sup> | ST2 <sup>a</sup> | ST3 <sup>a</sup> | ST4 <sup>a</sup> |
|-----------------|-------------|-------------|-----------|-------------|-------------|------------------|------------------|------------------|------------------|
| Sex(AME)        | XX          | XX          | XY        | XY          | XY          | XX               | XY               | XY               | XY               |
| <b>D1S548</b>   | 190/190     | 202/202     | 190/202   | 190/190     | 190/202     | 190/202          | 190/202          | 190/202          | 202/202          |
| <b>D2S1333</b>  | 285/301     | 293/301     | 289/297   | 297/301     | 297/301     | 297/301          | 285/297          | 293/297          | 289/301          |
| <b>D3S1768</b>  | 217/225     | 189/197     | 193/209   | 193/225     | 209/221     | 209/225          | 193/225          | 189/193          | 189/209          |
| <b>D4S413</b>   | 131/131     | 129/133     | 143/145   | 131/145     | 131/145     | 131/145          | 131/145          | 133/145          | 129/143          |
| <b>D4S2365</b>  | 283/287     | 279/287     | 287/287   | 283/287     | 287/287     | 287/287          | 287/287          | 287/287          | 279/287          |
| <b>D5S1457</b>  | 132/136     | 132/132     | 132/136   | 132/136     | 132/136     | 132/136          | 136/136          | 132/132          | 132/136          |
| <b>D6S501</b>   | 184/184     | 180/188     | 184/184   | 184/184     | 184/184     | 184/184          | 184/184          | 184/188          | 184/188          |
| <b>D7S513</b>   | 209/225     | 205/221     | 205/209   | 209/225     | 209/225     | 209/209          | 209/209          | 205/221          | 209/221          |
| <b>D7S794</b>   | 108/132     | 124/128     | 108/120   | 108/120     | 108/132     | 108/132          | 108/120          | 120/128          | 108/128          |
| <b>D8S1106</b>  | 140/144     | 144/152     | 156/160   | 140/160     | 144/160     | 144/160          | 144/156          | 152/156          | 152/156          |
| <b>D9S921</b>   | 179/179     | 187/187     | 179/179   | 179/179     | 179/179     | 179/179          | 179/179          | 179/187          | 179/187          |
| <b>D10S1412</b> | 163/163     | 157/157     | 157/157   | 157/163     | 157/163     | 157/163          | 157/163          | 157/157          | 157/157          |
| <b>D11S925</b>  | 308/308     | 306/328     | 312/312   | 308/312     | 308/312     | 308/312          | 308/312          | 306/312          | 312/328          |
| <b>D11S2002</b> | 260/260     | 252/256     | 256/256   | 256/260     | 256/260     | 256/260          | 256/260          | 252/256          | 256/256          |
| <b>D12S67</b>   | 113/117     | 125/208     | 129/129   | 113/129     | 117/129     | 113/129          | 113/129          | 125/129          | 125/129          |
| <b>D12S364</b>  | 290/290     | 268/272     | 282/290   | 282/290     | 282/290     | 290/290          | 282/290          | 268/290          | 272/282          |
| <b>D13S765</b>  | 228/232     | 220/256     | 216/232   | 232/232     | 216/228     | 228/232          | 228/232          | 220/232          | 232/256          |
| <b>D15S823</b>  | 333/357     | 345/349     | 349/361   | 349/357     | 357/361     | 333/349          | 357/361          | 349/361          | 349/361          |
| <b>D16S403</b>  | 156/162     | 142/160     | 164/164   | 162/164     | 156/164     | 156/164          | 162/164          | 142/164          | 142/164          |
| <b>D17S1300</b> | 236/236     | 236/240     | 228/247   | 236/247     | 228/236     | 236/247          | 228/236          | 228/240          | 240/247          |
| <b>D18S72</b>   | 306/322     | 312/314     | 308/308   | 306/308     | 306/308     | 306/308          | 306/308          | 308/314          | 308/312          |
| <b>D18S537</b>  | 158/174     | 170/174     | 162/174   | 174/174     | 174/174     | 158/162          | 162/174          | 162/170          | 170/174          |
| <b>D22S685</b>  | 327/339     | 291/339     | 315/327   | 327/339     | 315/327     | 327/339          | 327/327          | 291/315          | 327/339          |
| <b>DXS2506</b>  | 262/278     | 270/270     | 262/262   | 278/278     | 262/262     | 262/262          | 262/262          | 270/270          | 270/270          |
| <b>MFGT21</b>   | 117/125     | 99/117      | 127/127   | 125/127     | 117/127     | 125/127          | 117/127          | 99/127           | 99/127           |
| <b>MFGT22</b>   | 100/110     | 110/122     | 110/110   | 100/110     | 100/110     | 100/110          | 110/110          | 110/110          | 110/110          |
| <b>D6S291</b>   | 208/216     | 204/209     | 208/208   | 208/216     | 208/208     | 208/216          | 208/208          | 208/209          | 204/208          |
| <b>G25641</b>   | 273/277     | 267/279     | 261/291   | 261/277     | 273/291     | 277/291          | 273/291          | 267/291          | 279/291          |
| <b>G51152</b>   | 195/239     | 195/208     | 195/195   | 195/239     | 195/195     | 195/239          | 195/195          | 195/195          | 195/208          |
| <b>9P06</b>     | 169/175     | 177/187     | 175/187   | 175/175     | 169/187     | 175/187          | 169/187          | 187/187          | 177/187          |
| <b>DRA</b>      | 128/136     | 124/142     | 128/132   | 128/132     | 128/136     | 128/128          | 128/136          | 128/142          | 124/128          |
| <b>MICACA</b>   | 197/200     | 200/200     | 194/200   | 194/200     | 197/200     | 200/200          | 197/200          | 200/200          | 200/200          |
| <b>246K06</b>   | 273/283     | 273/281     | 277/283   | 277/283     | 273/283     | 283/283          | 273/283          | 281/283          | 273/283          |
| <b>162B17A</b>  | 238/250     | 236/246     | 238/250   | 250/250     | 238/238     | 238/250          | 238/238          | 236/238          | 238/246          |
| <b>162B17B</b>  | 293/313     | 305/309     | 289/317   | 293/317     | 289/313     | 289/293          | 289/313          | 289/309          | 289/305          |
| <b>151L13</b>   | 305/307     | 307/309     | 307/309   | 307/309     | 305/307     | 307/307          | 305/307          | 307/309          | 307/307          |



|                |         |         |         |         |         |         |         |         |         |
|----------------|---------|---------|---------|---------|---------|---------|---------|---------|---------|
| <b>MOGCA</b>   | 123/123 | 123/123 | 123/123 | 123/123 | 123/123 | 123/123 | 123/123 | 123/123 | 123/123 |
| <b>268P23</b>  | 150/150 | 150/150 | 150/150 | 150/150 | 150/150 | 150/150 | 150/150 | 150/150 | 150/150 |
| <b>222I18</b>  | 164/167 | 166/167 | 167/173 | 167/173 | 164/167 | 167/167 | 164/167 | 166/167 | 167/167 |
| <b>D6S276</b>  | 211/215 | 213/223 | 233/235 | 215/233 | 211/235 | 215/235 | 211/235 | 223/235 | 213/235 |
| <b>D6S1691</b> | 203/215 | 197/217 | 199/219 | 203/219 | 199/215 | 199/203 | 199/215 | 199/217 | 197/199 |

<sup>a</sup>ST1, 2, 3 and 4 are differentiated cell cultures derived from individual ST blastocyst outgrowths

**Supplementary Table 4. Short tandem repeat (STR) analysis of ST infants and cell lines (continued)**

| STR loci        | female<br>3 | female<br>4 | male<br>2 | infant<br>3 | female<br>5 | female<br>6 | male<br>3 | STES-1  | STES-2  |
|-----------------|-------------|-------------|-----------|-------------|-------------|-------------|-----------|---------|---------|
| Sex(AME)        | XX          | XX          | XY        | XY          | XX          | XX          | XY        | XY      | XX      |
| <b>D1S548</b>   | 190/202     | 190/206     | 206/206   | 202/206     | 190/190     | 194/206     | 190/206   | 194/206 | 190/190 |
| <b>D2S1333</b>  | 273/297     | 273/289     | 277/293   | 273/277     | 293/301     | 281/301     | 277/293   | 293/301 | 293/293 |
| <b>D3S1768</b>  | 225/229     | 205/221     | 213/213   | 213/229     | 193/205     | 205/213     | 213/225   | 205/225 | 205/213 |
| <b>D4S413</b>   | 129/151     | 129/143     | 131/145   | 131/151     | 129/131     | 131/151     | 129/135   | 131/135 | 129/131 |
| <b>D4S2365</b>  | 279/283     | 279/279     | 283/283   | 283/283     | 283/287     | 283/283     | 283/283   | 283/283 | 283/283 |
| <b>D5S1457</b>  | 132/132     | 132/132     | 136/136   | 132/136     | 132/132     | 128/132     | 128/132   | 128/132 | 128/132 |
| <b>D6S501</b>   | 176/180     | 180/180     | 180/184   | 180/184     | 176/180     | 184/184     | 180/180   | 180/184 | 180/180 |
| <b>D7S513</b>   | 189/205     | 217/235     | 197/201   | 189/201     | 189/231     | 203/217     | 191/193   | 193/217 | 191/231 |
| <b>D7S794</b>   | 120/128     | 120/124     | 108/124   | 124/128     | 108/124     | 108/108     | 108/128   | 108/128 | 124/128 |
| <b>D8S1106</b>  | 144/152     | 144/152     | 164/168   | 144/164     | 144/168     | 148/152     | 156/164   | 152/156 | 164/168 |
| <b>D9S921</b>   | 183/195     | 179/183     | 167/199   | 167/183     | 167/179     | 179/191     | 195/195   | 179/195 | 167/195 |
| <b>D10S1412</b> | 157/157     | 157/157     | 157/163   | 157/163     | 157/166     | 157/157     | 157/160   | 157/157 | 157/160 |
| <b>D11S925</b>  | 338/338     | 308/338     | 338/338   | 338/338     | 312/338     | 310/312     | 312/312   | 312/312 | 312/312 |
| <b>D11S2002</b> | 256/256     | 244/256     | 256/256   | 256/256     | 252/256     | 256/272     | 260/264   | 264/272 | 252/260 |
| <b>D12S67</b>   | 113/121     | 113/121     | 113/137   | 113/121     | 113/184     | 113/200     | 196/200   | 113/200 | 113/200 |
| <b>D12S364</b>  | 286/290     | 268/286     | 282/290   | 282/290     | 284/288     | 284/290     | 268/290   | 268/290 | 284/290 |
| <b>D13S765</b>  | 224/236     | 220/224     | 228/236   | 224/236     | 208/220     | 228/260     | 224/284   | 224/260 | 208/224 |
| <b>D15S823</b>  | 329/353     | 353/357     | 345/361   | 345/353     | 333/381     | 357/361     | 345/357   | 357/361 | 333/345 |
| <b>D16S403</b>  | 164/164     | 156/160     | 158/174   | 158/164     | 164/164     | 164/174     | 158/164   | 158/174 | 164/164 |
| <b>D17S1300</b> | 247/276     | 247/251     | 236/280   | 276/280     | 276/280     | 247/276     | 240/284   | 276/284 | 240/276 |
| <b>D18S72</b>   | 306/308     | 308/308     | 306/306   | 306/308     | 306/308     | 308/308     | 308/308   | 308/308 | 308/308 |
| <b>D18S537</b>  | 174/178     | 174/174     | 174/174   | 174/174     | 162/174     | 162/162     | 162/178   | 162/178 | 162/162 |
| <b>D22S685</b>  | 319/323     | 319/335     | 319/323   | 319/327     | 315/331     | 311/315     | 311/331   | 311/331 | 311/315 |
| <b>DXS2506</b>  | 262/262     | 262/262     | 270/270   | 262         | 262/270     | 262/262     | 262/262   | 262/262 | 262/262 |
| <b>MFGT21</b>   | 121/123     | 121/127     | 117/119   | 119/121     | 115/127     | 125/125     | 123/127   | 125/127 | 115/127 |
| <b>MFGT22</b>   | 100/110     | 100/104     | 110/110   | 110/110     | 104/104     | 100/104     | 104/124   | 100/104 | 104/104 |
| <b>D6S291</b>   | 206/208     | 206/208     | 208/208   | 208/208     | 206/208     | 206/208     | 208/216   | 206/216 | 206/208 |
| <b>G25641</b>   | 273/279     | N/A         | 263/271   | 263/279     | N/A         | N/A         | 269/281   | 269/269 | 269/281 |
| <b>G51152</b>   | 195/209     | N/A         | 209/219   | 195/219     | N/A         | 195/209     | 195/209   | 195/195 | 209/219 |

|                |         |         |         |         |         |         |         |         |         |
|----------------|---------|---------|---------|---------|---------|---------|---------|---------|---------|
| <b>9P06</b>    | 175/175 | 175/191 | 175/185 | 175/175 | 175/179 | 183/189 | 175/175 | 175/183 | 175/179 |
| <b>DRA</b>     | 130/136 | N/A     | 112/136 | 112/130 | 120/128 | 126/136 | 132/136 | 126/132 | 128/136 |
| <b>MICACA</b>  | 194/200 | N/A     | 200/200 | 200/200 | N/A     | 191/200 | 194/200 | 191/200 | 191/194 |
| <b>246K06</b>  | 277/283 | 277/277 | 275/283 | 283/283 | 275/283 | 277/279 | 279/283 | 277/283 | 275/283 |
| <b>162B17A</b> | 240/246 | 238/246 | 240/242 | 240/240 | 244/250 | 238/242 | 240/242 | 238/242 | 240/244 |
| <b>162B17B</b> | 293/305 | 305/315 | 281/289 | 289/293 | 289/311 | 309/311 | 293/309 | 309/311 | 293/311 |
| <b>151L13</b>  | 303/303 | 303/309 | 303/303 | 303/303 | 303/307 | 305/309 | 299/305 | 305/305 | 299/307 |
| <b>MOGCA</b>   | 123/125 | 123/123 | 123/123 | 123/123 | 123/123 | 123/123 | 121/127 | 123/127 | 121/123 |
| <b>268P23</b>  | 150/150 | 150/150 | 150/150 | 150/150 | 150/150 | 150/150 | 148/154 | 150/154 | 148/150 |
| <b>222I18</b>  | 168/168 | 161/168 | 168/168 | 168/168 | 161/168 | 168/168 | 173/173 | 168/173 | 161/173 |
| <b>D6S276</b>  | 233/237 | 215/233 | 225/235 | 225/237 | 215/225 | 215/233 | 225/235 | 233/235 | 225/225 |
| <b>D6S1691</b> | 197/203 | 197/203 | 197/203 | 197/203 | 197/209 | 197/197 | 197/209 | 197/209 | 197/209 |

\*Information on spindle and cytoplasm donors that contributed to offspring is available in Fig 3 A. N/A; data not available.

**Supplementary Table 5. Mitochondrial DNA heteroplasmy analysis by subcloning and sequencing of rhDHV1 region**

| <u>mtDNA source</u> | <u>No of clones</u> | <u>Matched to spindle donors</u> | <u>Matched to cytoplasm donors</u> |
|---------------------|---------------------|----------------------------------|------------------------------------|
| Infant 1            | 20                  | 0                                | 20                                 |
| Infant 2            | 21                  | 0                                | 21                                 |
| ST1 <sup>a</sup>    | 20                  | 0                                | 20                                 |
| ST2 <sup>a</sup>    | 21                  | 0                                | 21                                 |
| ST3 <sup>a</sup>    | 21                  | 0                                | 21                                 |
| ST4 <sup>a</sup>    | 20                  | 0                                | 20                                 |
| Infant 3            | 23                  | 0                                | 23                                 |
| STES-1              | 25                  | 0                                | 25                                 |
| STES-2              | 23                  | 0                                | 23                                 |

<sup>a</sup>ST1, 2, 3 and 4 are differentiated cell cultures derived from individual ST blastocyst outgrowths

## Supplementary methods

### Animals

All animal procedures were approved by the Institutional Animal Care and Use Committee at the ONPRC/OHSU.

### Ovarian stimulation of rhesus macaques

Controlled ovarian stimulation and oocyte recovery was performed as previously been described<sup>38,39</sup>. Briefly, starting at days 1-4 of the menstrual cycle, females displaying regular menstrual cycles received twice-daily injections of recombinant human FSH (Organon; 30 IU, im) for 8 days and recombinant human LH (Ares Serono; 30 IU, im) on days 7-8 of the stimulation protocol. In addition, animals received a GnRH agonist (Acyline; NIH/NICHD; 0.075 mg/kg body weight, sc) and human chorionic gonadotropin (hCG; Serono; 1,000 IU, im) on day 7 during the stimulation period approximately 36 hours prior to laparoscopic follicle aspiration and oocyte retrieval. Serum estradiol (E2) and progesterone (P4) measurements along with ultrasonographic scans were performed to monitor follicular response.

### Spindle-chromosomal complex transfer

Cumulus-oocyte complexes were collected from anesthetized animals by laparoscopic follicular aspiration and placed in HEPES-buffered TALP (modified Tyrode solution with albumin, lactate, and pyruvate)<sup>40</sup> containing 0.3% bovine serum albumin (TH3) at 37°C. Tubes containing follicular aspirates were placed in a portable incubator (Minitube, Verona) at 37°C for transport to the laboratory. Hyaluronidase (0.5 mg/ml) was added directly to the tubes containing aspirates followed by incubation at 37°C (30 seconds) before the contents were gently agitated with a serological pipette to disaggregate cumulus and granulosa cell masses and sifted through a cell strainer (Falcon, 70-µm mesh size; Becton Dickinson). Oocytes were retained in the mesh, whereas blood, cumulus, and granulosa cells were washed through the filter. The strainer was immediately backwashed with TH3, and the medium containing oocytes was collected. Residual cumulus cells were removed upon passage through a small-bore pipette (approximately 125 µm in inner diameter), and oocytes were placed in chemically defined, protein-free hamster embryo culture medium (HECM-9) medium<sup>41</sup> equilibrated at 37°C in 6% CO<sub>2</sub>, 5% O<sub>2</sub>, and 89% N<sub>2</sub> and covered with tissue culture oil (Sage IVF, Trumbull). Methods for oocyte enucleation and embryo culture were as described previously<sup>38</sup>. In brief, spindle-chromosomal complexes were isolated from mature metaphase II (MII) oocytes using the Oosight™ Imaging System ([www.cri-inc.com](http://www.cri-inc.com)) attached to an inverted microscope (Olympus) equipped with Narishige micromanipulators. Recipient MII oocytes were transferred to 30µl manipulation droplets of TH3 with 5 µg/ml cytochalasin B on a glass bottom manipulation dish ([www.willcowells.com](http://www.willcowells.com)) covered with paraffin oil (Zander IVF) and incubated at 37°C for 10-15 min before spindle isolation. The spindle was visualized using Oosight™ Imaging System and an oocyte positioned with spindle situated at 1-3 o'clock using the holding pipette (see Suppl. Video). An enucleation pipette (20-25µ outer diameter) was inserted through the zona pellucida using laser

assisted zona drilling ([www.hamiltonthorne.com](http://www.hamiltonthorne.com)) and a spindle was aspirated into the pipette with a small amount of cytoplasm and surrounding plasma membrane (see Suppl. Video). Next, a karyoplast containing spindle-chromosomal complex was briefly exposed to SeV extract ([www.cosmobio.co.jp](http://www.cosmobio.co.jp)) and then placed into perivitelline space of recipient cytoplasm on the side opposite to the 1st polar body (Suppl. video). Cell fusion by electroporation was induced by two 50  $\mu$ s DC pulses of 2.7 kV/cm (Electro Square Porator T-820, BTX, Inc.) in D-sorbitol buffer as previously described<sup>38</sup>. All nuclear transfer micromanipulation and fusion procedures were conducted on microscope glass stage warmers maintaining 37°C ([www.tokaihit.com](http://www.tokaihit.com)). Reconstructed oocytes were fertilized by intracytoplasmic sperm injection (ICSI) approximately 1-2 hours post spindle transfer. Fertilization by ICSI and embryo culture were performed as described<sup>37</sup>. Briefly, sperm were diluted with 10% polyvinylpyrrolidone (1:4; Irvine Scientific), and a 5- $\mu$ l drop was placed in a micromanipulation chamber. A 30- $\mu$ l drop of TH3 was placed in the same micromanipulation chamber next to the sperm droplet, and both were covered with tissue culture oil. The micromanipulation chamber was mounted on an inverted microscope equipped with Hoffman optics and micromanipulators. An individual sperm was immobilized by physical manipulation, aspirated tail first into an ICSI pipette, and injected into the cytoplasm of an oocyte, away from the polar body. After ICSI, injected oocytes were placed in 4-well dishes (Nalge Nunc) containing protein-free HECM-9 medium covered with tissue culture oil and cultured at 37°C in 6% CO<sub>2</sub>, 5% O<sub>2</sub>, and 89% N<sub>2</sub>. Embryos at the eight-cell stage were transferred to fresh plates of HECM-9 medium supplemented with 5% fetal bovine serum (FBS) (HyClone) and cultured for a maximum of 9 days, with medium change every other day.

## **Embryo Transfer**

Beginning 8 days after menses detection during a spontaneous menstrual cycle, blood samples were collected daily from the saphenous vein for determination of estradiol by radioimmunoassay. The LH surge was estimated to occur before the precipitous decline in serum estradiol, typically to levels below 100 pg/ml. The next day after serum estradiol peak was considered the day of ovulation (Day 1). This peak occurred on average 11 days postmenses, with a range from 8 to 17 days. Two to 6 days after the estradiol peak, ST embryos, typically two per recipient, were transferred surgically to the oviduct ipsilateral to the ovary bearing the ovulatory stigma in anesthetized recipients as described previously<sup>37</sup>.

## **ES cell derivation and culture**

The inner cell masses (ICMs) of blastocysts was isolated by laser-assisted ablation of trophectoderm cells ([www.hamiltonthorne.com](http://www.hamiltonthorne.com)) followed by dispersal of remaining trophectoderm cells by gentle pipetting with a small bore pipette. Isolated ICMs were plated onto feeder layers (mouse embryonic fibroblasts, mEFs) in ES cell culture medium consisting of DMEM/F12 medium with glucose and without sodium pyruvate supplemented with 1% nonessential amino acids, 2 mM l-glutamine, 0.1 mM  $\beta$ -mercaptoethanol and 15% FBS at 37 °C, 3% CO<sub>2</sub>, 5% O<sub>2</sub> and 92% N<sub>2</sub>. ICM outgrowths were manually dissociated into small clumps with a microscalpel and replated on fresh

mEFs. After the initial passage, colonies with ES cell-like morphology were selected for further propagation, characterization, and *in vitro* and *in vivo* differentiation as previously described<sup>38,42</sup>. Culture medium was changed daily and the ES cell colonies were typically split every 5-7 days by manual dissociation and the collected clumps were replated onto fresh mEFs.

### **Immunocytochemical procedures**

For spindle morphology, oocytes were fixed in Buffer M as has previously been described<sup>43</sup>. Microtubules were labeled with a mixture of acetylated  $\alpha$ -tubulin and  $\beta$ -tubulin antibodies (Sigma). For detection of active mitochondria in oocytes, cell counting in blastocysts and marker expression in ES cell, samples were fixed in 4% paraformaldehyde. Active mitochondria were labeled with MitoTracker<sup>®</sup> Red CMTM Ros (Molecular Probes) and ICMs in blastocysts with NANOG antibody (R & D Systems, Inc.). Antibodies for OCT4, SSEA-4, TRA1-60 and TRA1-81 were from Santa Cruz Biotechnology Inc., and neural-specific antibodies including microtubule-associated protein 2 (MAP2),  $\beta$ -III tubulin and tau-1 were from Chemicon International Inc. Samples were examined under laser scanning confocal microscope (Leica Microsystems, Inc.) or epifluorescence microscope (Nikon).

### **MtDNA analysis**

MtDNA analysis was performed as previously described<sup>38</sup>. DNA was extracted from blood or cultured cells using commercial kits (Gentra). The rhesus macaque mitochondrial D-loop hypervariable region 1 (RhDHV1) sequence was amplified using forward primer (5'-CCAACACCCAAAGCTGGCATTCTA-3') and reverse primer (5'-ATGGCCCTGAGGTAAGAACCAGAT-3'). PCR for each sample was performed using Pfx50 DNA polymerase (Invitrogen) containing 0.5  $\mu$ M of each primer (final volume 50  $\mu$ l). Reaction conditions were initial denaturation at 94° C for 5 min; 35 cycles of denaturation at 94° C for 30 s, annealing at 60° C for 30 s, extension at 68° C for 90 s and a final extension at 68° C for 3 min, generating 543 bp of sequence covering the RhDHV1 region. PCR products were sequenced and informative SNPs encompassing *Macaca mulatta* mtDNA nucleotide positions 15974-16516 (GenBank NC\_005943) were identified using Sequencher v. 4.7 software (GeneCodes).

For heteroplasmy analysis by subcloning, PCR products were cloned using Zero Blunt<sup>®</sup> TOPO<sup>®</sup> vector (Invitrogen). Twenty to twenty five colonies were randomly selected and sequenced as described above. For Restriction Fragment Length Polymorphism (RFLP) analysis, PCR products were amplified as described above. Unique restriction digestion sites were identified with Sequencher v. 4.7. Both HindIII and KpnI were from Fermentas Inc. For reactions, quantity of PCR products was adjusted to 1  $\mu$ g and digested by enzymes overnight. Samples were analyzed using 3% agarose gel.

Real-time PCR primers and fluorescent probes (TaqMan MGB probe; Applied Biosystems.) were designed to detect unique mtDNA SNPs of cytoplasm and spindle donor animals. For females 1 and 2, forward primer (5'-TGCCAGTCGTCCATAGTACA -3'; nps16298-16309) and reverse primer (5'-CGGAGCGAGGAGAGTAGCAC -3'; nps 16429-16448) were designed in areas with no SNPs.

The probe for female 1 (5'-CAC [C] ACGGATGC [T] CCCC [T] TCA-3') was labeled with the fluorescent reporter VIC and the probe for female 2 (5'-CCTC [C] TCAC [T] ACGGATGC [C] CCC-3') was labeled with the fluorescent reporter FAM. Both probes possessed three SNPs within their sequence. For combination of females 5 and 6, forward primer was 5'-CGTCCATAGTACATTAAGTCGTTCA-3' (nps16297-16321) and reverse primer was 5'-GGAGCGAGGAGAGTAGCAC-3' (nps 16430-16488). The probe for the female 5 mtDNA (5'-CCCCTCACTTAGG [A] [G] TCCCTT [A] CTCACC -3') was labeled with the fluorescent reporter VIC and probe for the female 6 (5'-CCCCTCACTTAGG [G] [A] TCCCTT [G] CTCACC -3') was labeled with the fluorescent reporter FAM. The probes were obtained from Applied Biosystems. Two different fluorescent probes were mixed and measured in one well. The allelic discrimination assay using 7500 Fast Real-time PCR system (Applied Biosystems) was used to measure each fluorescent signal. We first analyzed dilutions of mtDNA (5 fold dilution) corresponding to each probe to confirm the specificity of the probe. The reactions were performed as follows; initial denaturation 95°C for 20s, and 30 cycles at 95°C for 3s (denaturation), 66°C (for combination of females 1 and 2) and 65°C (for combination of females 5 and 6) for 30s (annealing and extension). The initial concentration of all mtDNA samples was adjusted to 30ng/μl. MtDNA from two females was mixed at various ratios (0, 1, 3, 5.....95, 97, 99, 100) to calculate a standard curve. The number of cycles was increased to 50 and undetermined signal was considered to be 50. The concentration of mixed mtDNA and samples were adjusted to 30ng/μl. Each sample was analyzed 3 times and values were estimated based on mean Ct value (±s.d).

### **Reverse transcription (RT)-PCR analysis for presence of Sendai virus (SeV)**

Total RNA was extracted from placenta of ST twins and STES-1 and STES-2 cell lines using TRIzol<sup>®</sup> Reagent (Invitrogen), treated with DNase I and converted to cDNA using the SuperScript III first strand synthesis system for RT-PCR (Invitrogen) according to the manufacturer's instructions. Next, the first strand cDNA was amplified by PCR using SeV F protein specific primers (forward primer; 5'-GTGATTGGTACTATCGCACTT-3', reverse primer; 5'-CTGGCTGTCAGGTATCAGTTG-3') as previously described<sup>36</sup>. Sendai virus, Cantell Strain (Charles River) was used as a positive control. PCR reaction was performed using Platinum<sup>®</sup> PCR super Mix High Fidelity (Invitrogen) containing 0.5 μM of each primer (final volume 50 μl). Reaction conditions were: initial denaturation at 94°C for 5 min; 40 cycles of denaturation at 94°C for 30 s, annealing at 50°C for 60 s, extension at 68°C for 60 s and a final extension at 68° C for 3 min. Expected size band is 715 bp. All PCR samples were analyzed by electrophoresis on 2% agarose gel containing 0.5μg ml<sup>-1</sup> ethidium bromide and visualized using a transilluminator.



## Supplementary references

- 36 Tsuboniwa, N. *et al.* Safety evaluation of hemagglutinating virus of Japan--artificial viral envelope liposomes in nonhuman primates. *Hum Gene Ther* **12**, 469-487 (2001).
- 37 Wolf, D. P. *et al.* Use of assisted reproductive technologies in the propagation of rhesus macaque offspring. *Biol Reprod* **71**, 486-493 (2004).
- 38 Byrne, J. A. *et al.* Producing primate embryonic stem cells by somatic cell nuclear transfer. *Nature* **450**, 497-502 (2007).
- 39 Mitalipov, S. M. *et al.* Reprogramming following somatic cell nuclear transfer in primates is dependent upon nuclear remodeling. *Hum Reprod* **22**, 2232-2242 (2007).
- 40 Bavister, B. D. & Yanagimachi. The effects of sperm extracts and energy sources on the motility and acrosome reaction of hamster spermatozoa in vitro. *Biol Reprod* **16**, 228-237 (1977).
- 41 McKiernan, S. H. & Bavister, B. D. Culture of one-cell hamster embryos with water soluble vitamins: pantothenate stimulates blastocyst production. *Hum Reprod* **15**, 157-164 (2000).
- 42 Mitalipov, S. *et al.* Isolation and characterization of novel rhesus monkey embryonic stem cell lines. *Stem Cells* **24**, 2177-2186 (2006).
- 43 Simerly, C. & Schatten, G. Techniques for localization of specific molecules in oocytes and embryos. *Methods Enzymol* **225**, 516-553 (1993).
